# Supplementary material for: First-principles calculation of in-plane and out-of-plane piezoelectric properties of two-dimensional Janus MoSSiX2 (X = N, P, As) monolayers
Source: Royal Society of Chemistry journal article supplement (doi:10.1039/d4nj00482e), 2024-01-01
Supplement: d4nj00482e1.pdf [file d4nj00482e1.pdf]

## Electronic Supplementary Information (ESI)

### First-principles calculation of in-plane and out-of-plane piezoelectric properties of two-dimensional Janus MoSSiX<sub>2</sub> (X=N, P, As) monolayers

Wantao Gan<sup>a</sup>, Xinguo Ma<sup>a,b\*</sup>, Jiajun Liao<sup>a</sup>, Tian Xie<sup>a</sup>, Nan Ma<sup>c</sup>

<sup>a</sup> School of Science, Hubei University of Technology, Wuhan 430068, China

<sup>b</sup> State Key Laboratory of Advanced Technology for Float Glass, Bengbu Glass Industrial Design and Research Institute, Bengbu, 233030, China

<sup>c</sup> Key Laboratory of Inorganic Functional Materials and Devices, Chinese Academy of Sciences, Shanghai 201899, China

\*Corresponding Author, E-mail: maxg@hbut.edu.cn (X. Ma)

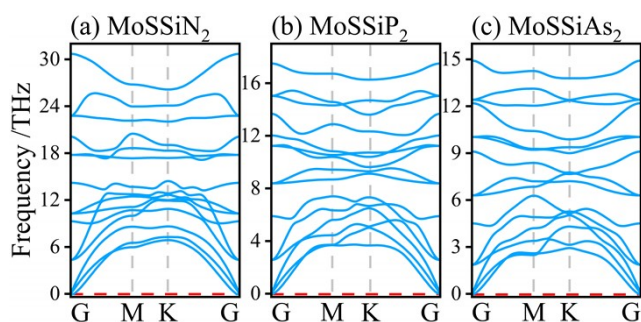

**Fig. S1.** The phonon dispersion curve after applying a 4% compressive strain of Janus MoSSiX<sub>2</sub> (X=N, P, As) monolayers.
